# Supplementary material for: Polydopamine coated TiO2nanofiber fillers for polyethylene oxide hybrid electrolytes for efficient and durable all solid state lithium ion batteries
Source: Royal Society of Chemistry journal article supplement (doi:10.1039/d1nr06636f), 2021-12-09
Supplement: d1nr06636f1.pdf [file d1nr06636f1.pdf]

## Electronic Supplementary Information

### **Polydopamine coated TiO<sub>2</sub> nanofibers filled polyethylene oxide hybrid electrolyte for efficient and durable all solid state lithium ion batteries**

Erqing Zhao,<sup>a</sup> Yudi Guo,<sup>\*b</sup> Awei Zhang<sup>a</sup>, Hongliang Wang<sup>a</sup> and Guangri Xu<sup>a</sup>

<sup>a</sup> School of Chemistry and Chemical Engineering, Henan Institute of Science and Technology, Xinxiang 453003, China

<sup>b</sup> School of Chemistry and Materials Engineering, Xinxiang University, Xinxiang 453003, China.

**Corresponding author:**

E-mail: guoydhappy@126.com (Y.D. Guo)

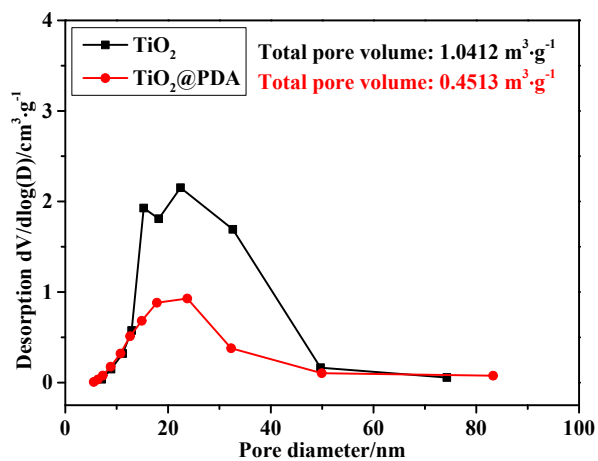

Fig.S1. The pore size distribution curves of  $\text{TiO}_2$  and  $\text{TiO}_2@PDA$  samples.

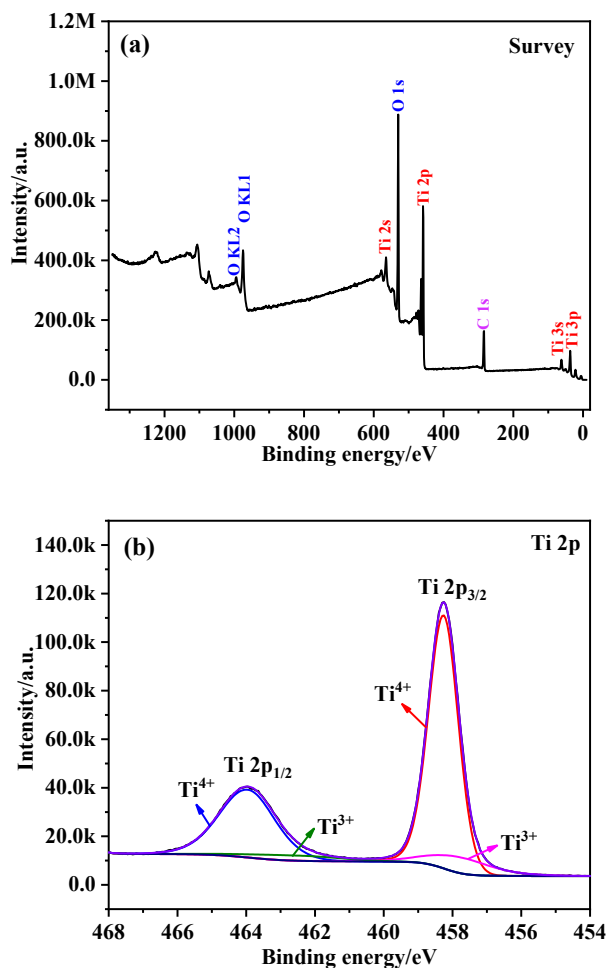

Fig. S2. (a) Survey and (b) Ti XPS patterns of  $\text{TiO}_2$  materials.

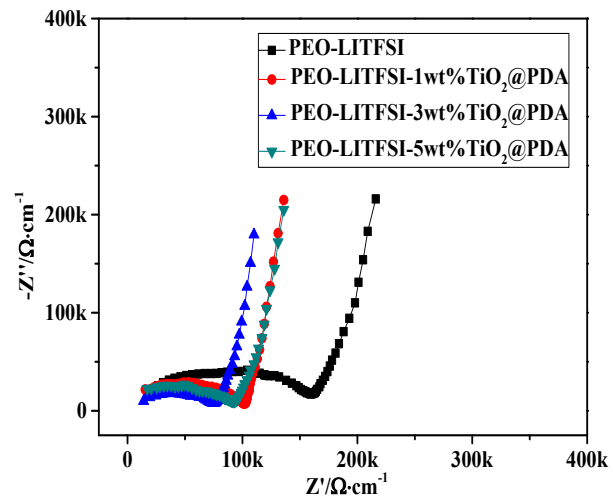

Fig. S3. The room temperature EIS spectrum of PEO-LITFSI of PEO-LITFSI-TiO<sub>2</sub>@PDA solid polymer electrolyte.

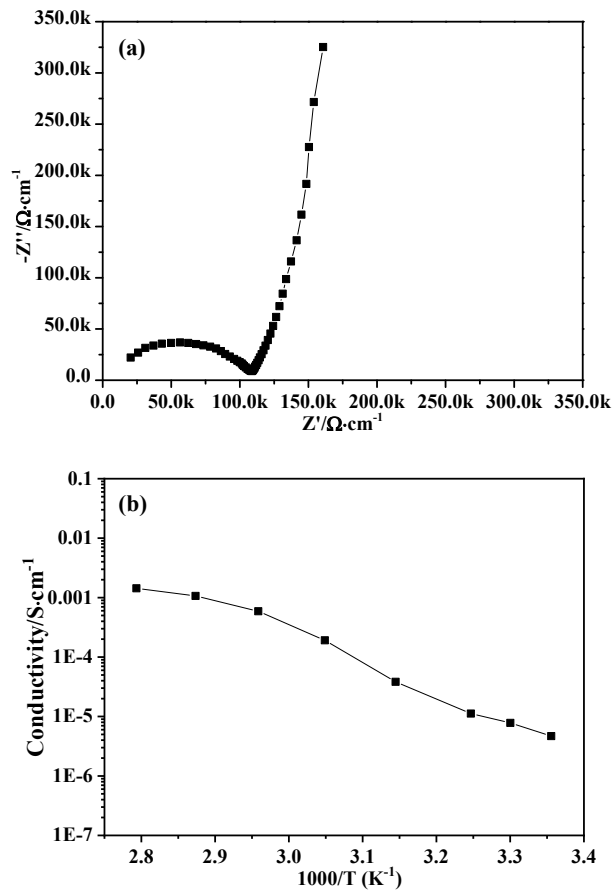

Fig. S4. The room temperature EIS spectrum (a) and ionic conductivity curve (b) of PEO-LITFSI-3wt% TiO<sub>2</sub> solid polymer electrolyte.

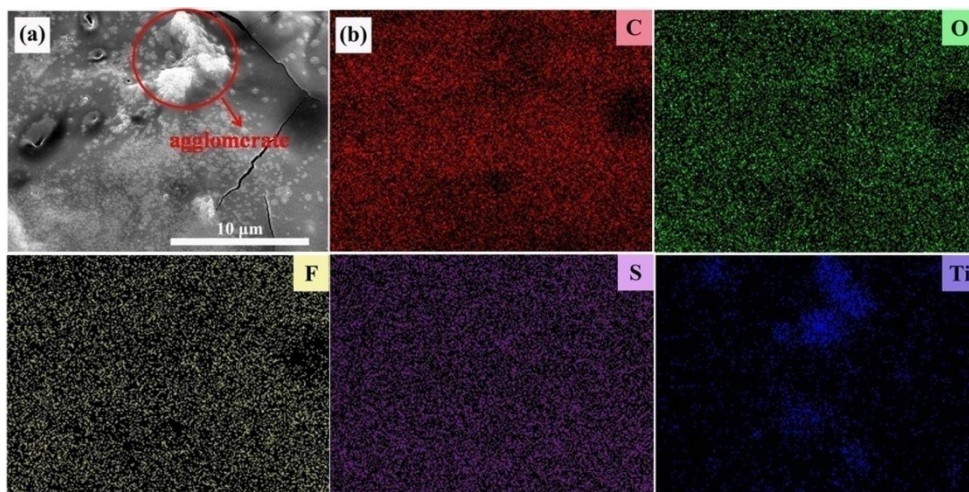

Fig. S5. (a) Surface SEM image and (b) surface ESD mapping of PEO-LITFSI-3wt% TiO<sub>2</sub> solid electrolytes.

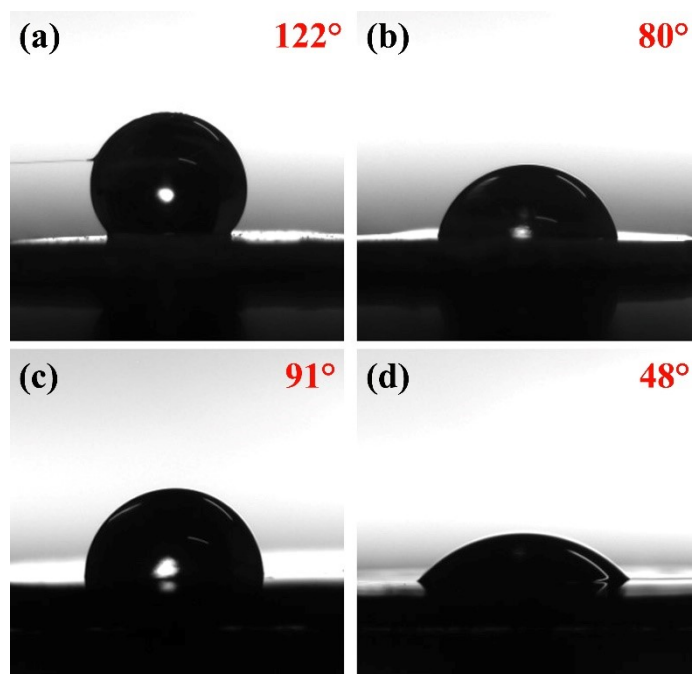

Fig. S6. Contact angles between PEO solutions and TiO<sub>2</sub> or TiO<sub>2</sub>@PDA tablets: (a)-(c) 5 wt% PEO solution; (b)-(d) 2.5 wt% PEO solution.

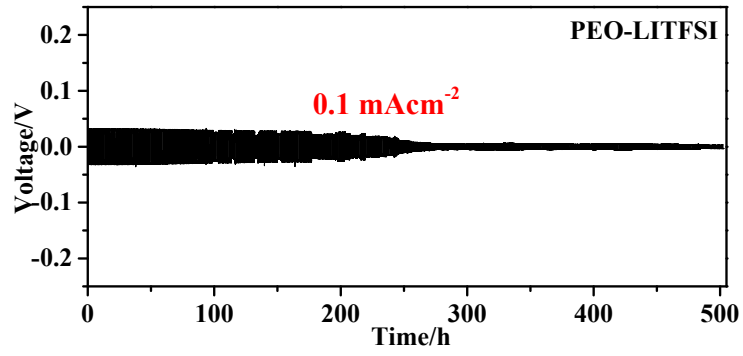

Fig. S7. The Li plating/stripping profiles of Li/PEO-LITFSI /Li symmetric cells measured at the current density of 0.1  $\text{mA cm}^{-2}$ .

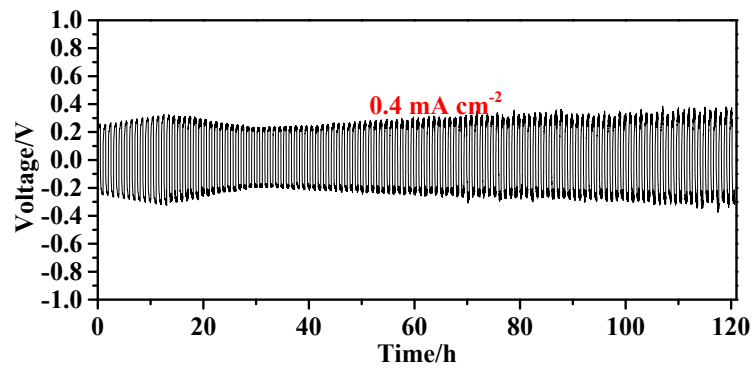

Fig. S8. The Li plating/stripping profiles of Li/SCE/Li symmetric cell measured at the current density of 0.4  $\text{mA cm}^{-2}$ .

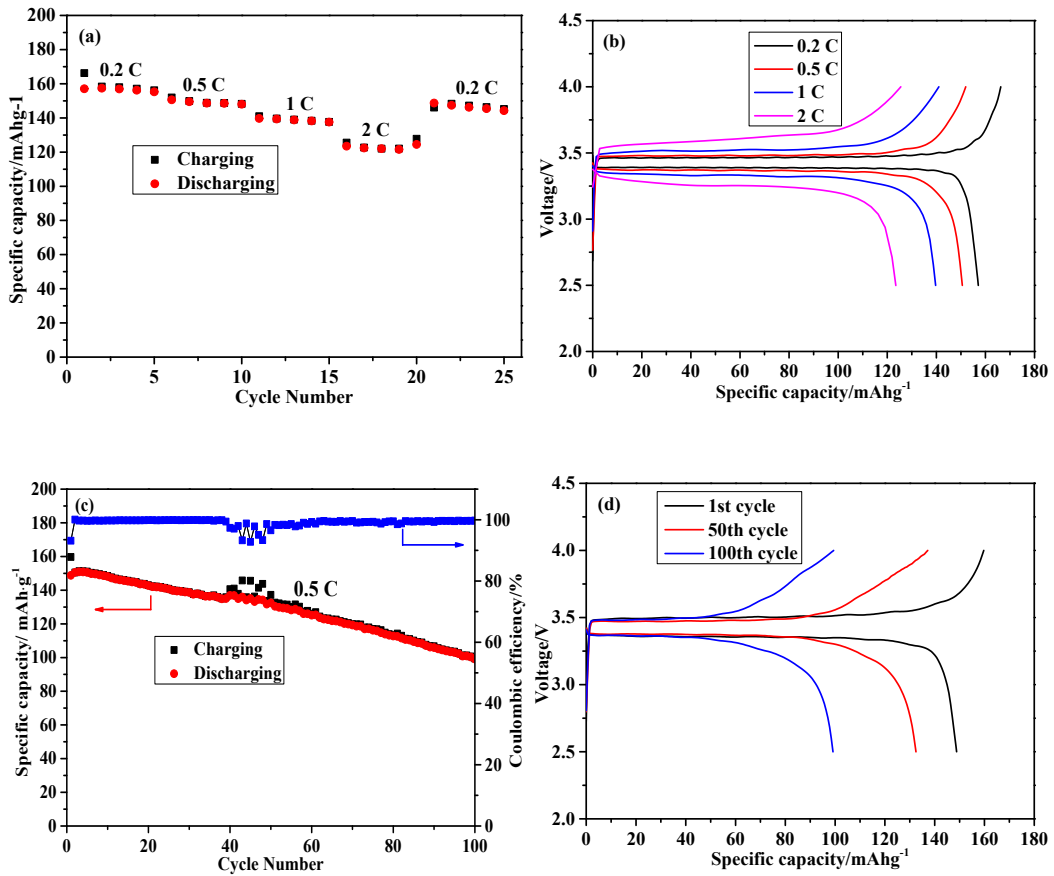

Fig. S9. (a) Rate performance and (b) charging-discharging curves of LiFePO<sub>4</sub>/Li ASSLIB with PEO-LITFSI solid electrolyte; (c) Cycling performance and (d) charging-discharging profiles of LiFePO<sub>4</sub>/Li ASSLIB measured at 0.5 C.

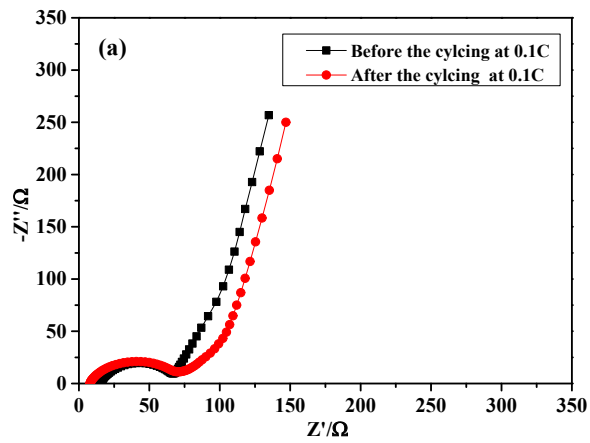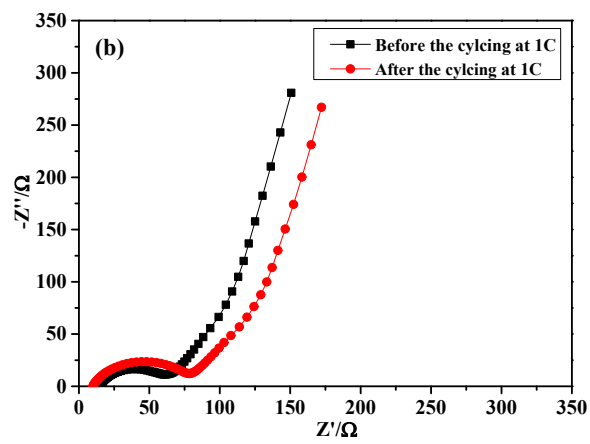

Fig. S10. AC impedance spectra of  $\text{LiFePO}_4/\text{SPE}/\text{Li}$  cells measured before and after the charge-discharge cycling at different current densities.
